# Supplementary material for: Combined linkage and association mapping reveal QTL for host plant resistance to common rust (Puccinia sorghi) in tropical maize
Source: BMC Plant Biol. 2018 Nov 29;18:310. doi: 10.1186/s12870-018-1520-1 (PMC6267831; doi:10.1186/s12870-018-1520-1)
Supplement: Supplementary file 2 — Response of inbred lines constituting the drought tolerant maize for Africa association mapping panel to common rust in different environments. (XLSX 34 kb) [file 12870_2018_1520_MOESM2_ESM.xlsx]

## Sheet: Table S1
Additional file 2. Response of inbred lines constituting the drought tolerant mazie for Africa association mapping panel to common rust in different environments
Entry	Inbred line ID	BA09A	BA09B	BA11	Celaya	Kenya09	Combined
1	DTMA-1	1.33333	1.83063	1.33333	1.69216	1.92463	1.65481
2	DTMA-2	1	1.44445	1	NA	2.41584	1.60639
3	DTMA-3	1	1.0211	1.66667	1.51936	1.7751	1.40786
5	DTMA-5	1	1.05976	1.66667	2.00788	NA	1.49697
6	DTMA-6	1	1.34569	1.33333	1.4928	1.57337	1.35275
7	DTMA-7	1	0.988958	1.16667	1.83	1.43139	1.28473
8	DTMA-8	1.33333	1.58243	1.33333	1.81769	1.62421	1.51825
9	DTMA-9	1	1.14528	1	2.00934	1.54046	1.36377
10	DTMA-10	1	2.12121	1	1.4898	1.65793	1.4466
11	DTMA-11	1	1.12367	1	1.65926	1.57564	1.28783
12	DTMA-12	1	2.14619	1	1.68024	1.98844	1.59183
13	DTMA-13	1	1.53083	1	1.98858	1.68769	1.4458
14	DTMA-14	1	1.5113	1	1.83668	1.57073	1.34549
15	DTMA-15	1	1.66246	1	1.99902	1.66961	1.48769
17	DTMA-17	1	1.30771	1	0.997534	1.723	1.19228
18	DTMA-18	2.66667	2.30808	2	2.51098	1.62137	2.22658
19	DTMA-19	NA	1.96556	1.33333	NA	1.37861	1.616
20	DTMA-20	2.33333	2.1934	2	2.83936	2.89552	2.44204
21	DTMA-21	1	1.06837	1	1.68587	1.73133	1.29923
22	DTMA-22	1	1.56314	2	2.16656	1.77292	1.71534
24	DTMA-24	1	1.62055	1.5	1.49409	1.68729	1.45777
25	DTMA-25	1	1.00278	1.5	1.83327	1.38519	1.33127
26	DTMA-26	1	2.04354	1	2.15455	1.61391	1.58047
27	DTMA-27	1	1.38107	1.66667	1.97077	2.11265	1.63127
28	DTMA-28	1.66667	1.50171	1.83333	NA	1.88767	1.82941
29	DTMA-29	NA	1.53262	1	NA	1.97997	1.57314
30	DTMA-30	1.33333	1.50382	1.66667	1.48953	1.63896	1.53307
31	DTMA-31	1.33333	1.362	1.66667	1.83332	1.58694	1.51482
32	DTMA-32	1.33333	1.024	1.66667	3.01016	1.71848	1.72979
33	DTMA-33	1	1.70811	1.33333	2.00982	1.72331	1.57087
34	DTMA-34	1	1.39108	1.33333	1.34393	1.57512	1.31289
35	DTMA-35	1.5	1.72627	1	1.82363	1.58562	1.52451
36	DTMA-36	1	1.0169	1	1.15496	1.8403	1.18405
37	DTMA-37	1.16667	1.35743	1.66667	1.9826	1.3515	1.4858
38	DTMA-38	2.5	3.29713	2.66667	NA	3.54666	3.11965
39	DTMA-39	1	1.31528	1.16667	1.85011	2.05161	1.47177
40	DTMA-40	1	1.51222	1	2.0089	2.0823	1.49361
41	DTMA-41	2.33333	2.80909	1.83333	2.16077	2.10842	2.26475
42	DTMA-42	1	1.01621	1.66667	2.8595	2.41421	1.80939
43	DTMA-43	3.5	3.02443	2	2.98399	2.76299	2.84263
44	DTMA-44	1	1.68515	1.66667	3.01034	2.09368	1.89365
45	DTMA-45	3.16667	2.8457	2.33333	2.99549	2.51883	2.75505
47	DTMA-47	1	1.86167	1.66667	1.50042	1.48245	1.49809
48	DTMA-48	2	1.73411	1.16667	2.0013	1.8702	1.76656
49	DTMA-49	1.33333	1.97126	1.66667	2.486	2.07271	1.89632
50	DTMA-50	1	1.20829	1	2.00616	1.93294	1.43911
51	DTMA-51	1	1.40367	1	1.15503	2.05369	1.32645
52	DTMA-52	1.66667	1.35402	1.33333	3.02897	1.81909	1.85872
53	DTMA-53	1.50794	2.07122	1.66667	2.66512	1.72252	1.92006
54	DTMA-54	1.66667	3.23635	1	NA	2.11008	2.12665
55	DTMA-55	1.5	1.68254	2	4.1524	2.51089	2.35314
56	DTMA-56	3.5	4.07967	3	3.85411	3.58282	3.59337
57	DTMA-57	3.66667	2.66693	1.83333	3.65454	3.59286	3.06313
58	DTMA-58	2.5	2.76153	2	2.5053	2.97747	2.53083
59	DTMA-59	2	2.3159	2	2.67359	2.61144	2.2951
60	DTMA-60	4.33333	4.45157	2.16667	4.99799	4.9218	4.19422
61	DTMA-61	2.5	1.71909	1.33333	2.49397	2.31537	2.08347
62	DTMA-62	4.33333	3.36058	4	5.00831	4.92877	4.32965
63	DTMA-63	4.16667	3.65029	3.33333	4.99822	4.9922	4.2011
64	DTMA-64	2.5	2.4775	1.66667	2.50446	2.7589	2.4263
65	DTMA-65	1	1.69947	1	1.83941	1.79725	1.47586
66	DTMA-66	1.33333	2.10041	2	2.17226	2.00531	1.90071
67	DTMA-67	1	1.81565	1.33333	2.00775	1.8334	1.59034
68	DTMA-68	1	1.49368	1.33333	1.83195	2.3576	1.60079
69	DTMA-69	3.33333	2.95831	2.5	2.9989	3.03856	2.94692
70	DTMA-70	3.16667	2.61944	1.83333	4.15806	3.84517	3.09288
71	DTMA-71	4.33333	3.80342	3.66667	4.98449	4.85589	4.30113
72	DTMA-72	4	4.4739	3.83333	4.99842	5.10313	4.46412
73	DTMA-73	4	3.97687	3	4.5041	4.96599	4.08062
74	DTMA-74	3.83333	2.39617	2.5	3.47688	4.53105	3.31524
75	DTMA-75	3.25794	3.41518	2.66667	3.9945	4.22261	3.51972
76	DTMA-76	1.33333	1.2698	2	3.1771	NA	2.02812
77	DTMA-77	1.66667	1.88551	2	2.49322	2.14198	2.04219
78	DTMA-78	1.5	2.21704	1.66667	2.99097	2.71011	2.20318
79	DTMA-79	1	0.990407	1.16667	1.31262	1.29395	1.15206
80	DTMA-80	1	1.53561	1	1.16225	1.53106	1.26092
81	DTMA-81	1	0.951474	1	0.998641	1.74029	1.12715
82	DTMA-82	NA	NA	1	1.67794	1.70684	1.31771
83	DTMA-83	1	1.07378	1.33333	1.16657	1.4198	1.19609
84	DTMA-84	1	2.00209	1.33333	3.31558	2.1685	1.93892
85	DTMA-85	4.5	4.43595	3.5	NA	2.92345	3.91598
86	DTMA-86	3.5	3.18888	2	2.52476	2.64205	2.76939
87	DTMA-87	1.33333	2.32258	2.33333	3.49687	2.54063	2.40045
88	DTMA-88	3.5	3.69281	2.5	3.35376	3.54485	3.3374
89	DTMA-89	1.33333	1.47968	1.16667	0.98675	1.62192	1.32984
90	DTMA-90	1	1.51163	1	1.03163	1.11873	1.15562
91	DTMA-91	1	1.05908	1.33333	1.47924	1.98746	1.3442
92	DTMA-92	1.5	1.34453	1.33333	1.65756	3.17443	1.80242
93	DTMA-93	1	1.05388	1	0.984076	1.34782	1.07457
94	DTMA-94	1	1.191	1	0.996154	1.57009	1.15842
95	DTMA-95	1.66667	3.13387	2.27153	3.16	1.85085	2.41968
96	DTMA-96	2	1.85212	2	3.3273	2.47138	2.3313
97	DTMA-97	1	1.31213	1	1.50672	1.32127	1.24273
98	DTMA-98	1	1.47843	1.33333	0.983307	2.30428	1.42482
99	DTMA-99	2	2.18291	2	1.49669	1.92052	1.91973
100	DTMA-100	2	2.07521	1	2.84107	2.41779	2.05054
101	DTMA-101	1.5	2.47018	1.49902	2.67677	2.11279	2.06115
102	DTMA-102	1.16667	2.32097	1	0.996746	1.42834	1.36257
103	DTMA-103	1.16667	1.70024	2.16667	2.83946	2.31316	2.04206
104	DTMA-104	2	1.82454	1.66667	1.67383	2.08073	1.85156
105	DTMA-105	2	1.15843	2	2.67987	1.83507	1.93058
106	DTMA-106	2.16667	1.67702	2	1.68601	2.47981	2.03477
107	DTMA-107	3.33333	2.31273	2	2.65201	1.9738	2.44324
108	DTMA-108	2.5	2.31832	1.33333	1.32894	1.4869	1.78815
109	DTMA-109	1.33333	1.00063	1.33333	1.33853	1.42467	1.30065
110	DTMA-110	1.5	1.38788	2.83333	2.49274	1.96113	2.03659
111	DTMA-111	1	1.11291	1	1.83845	2.48767	1.46862
112	DTMA-112	1	1.01442	1	1.00885	1.07905	1.0059
113	DTMA-113	1.33333	1.86429	1.33333	1.81166	1.4695	1.56245
114	DTMA-114	1.83333	1.49314	1.66667	NA	2.11068	1.87641
115	DTMA-115	2.33333	3.16231	3	3.00448	3.63195	3.04145
116	DTMA-116	2	1.15359	2.16667	3.51042	3.13727	2.39706
117	DTMA-117	1.5	2.17081	1.66667	2.48392	2.25314	2.02874
118	DTMA-118	1.33333	1.48689	1.66667	1.99236	1.70774	1.64733
119	DTMA-119	3.16667	1.828	2	2.81855	2.67482	2.48936
120	DTMA-120	1	1.31999	2.33333	3.32399	2.82852	2.18633
121	DTMA-121	1.5	2.20726	1.66667	2.02162	1.65888	1.81148
122	DTMA-122	2.16667	1.8283	1.66667	1.9928	2.02036	1.94942
123	DTMA-123	1.5	1.16271	2.83333	3.66048	2.49179	2.31632
124	DTMA-124	1	1.11915	1.66667	1.84095	1.67953	1.46545
125	DTMA-125	1	1.02196	2.16667	2.65244	1.74358	1.72287
126	DTMA-126	3.16667	2.15895	2	2.33461	2.85369	2.47586
127	DTMA-127	1	1.13732	1.83333	2.33635	1.53825	1.5592
128	DTMA-128	2	1.51934	2	3.15494	2.21765	2.16199
129	DTMA-129	1	2.19647	1.66667	1.66213	1.76498	1.65449
130	DTMA-130	1.00794	1.46846	1.66667	1.84787	2.01363	1.6133
131	DTMA-131	1.33333	2.17241	1.66667	NA	1.75615	1.84914
132	DTMA-132	1.66667	2.04343	1.33333	1.98646	2.16398	1.823
133	DTMA-133	1.66667	1.32367	1	1.6807	1.15541	1.38676
134	DTMA-134	1	1.64935	1.66667	1.01343	1.45703	1.36053
135	DTMA-135	1.83333	2.42531	2.33333	2.83449	2.43383	2.36801
136	DTMA-136	1.33333	0.990148	1.66667	2.83962	1.80373	1.75423
137	DTMA-137	1	1.51381	1	1.98971	1.32426	1.35287
138	DTMA-138	1.33333	1.80634	2.33333	3.00111	2.84191	2.25433
139	DTMA-139	1	1.57295	1	1.16097	1.45341	1.22088
140	DTMA-140	1	1.04623	1.33333	1.85095	1.45	1.3612
141	DTMA-141	3.76621	3.38399	2.16667	3.34007	2.92298	3.08131
142	DTMA-142	1	1.20845	1.66667	2.15894	2.03236	1.61967
143	DTMA-143	1.66667	2.07893	2.16667	3.00086	3.21761	2.42057
144	DTMA-144	2.16667	2.38562	2.16667	2.82602	2.99857	2.51861
145	DTMA-145	1	1.48731	1.33333	2.33803	2.11228	1.6685
146	DTMA-146	1	1.62567	2	2.1603	1.98143	1.74421
147	DTMA-147	1	1.01729	2	1.99084	1.78779	1.55207
148	DTMA-148	1	1.21528	1	1.0073	1.36585	1.10651
149	DTMA-149	1	1.87101	1.5	1.9984	1.9731	1.67753
150	DTMA-150	1	1.70028	1.33333	0.986514	1.8162	1.37977
151	DTMA-151	1	1.16029	1.66667	2.00677	1.87217	1.57372
152	DTMA-152	1.83333	2.02506	1.66667	2.64367	1.84973	1.99763
153	DTMA-153	3.33333	3.70882	2.66667	3.83171	3.53998	3.43924
154	DTMA-154	2	1.94293	1.83333	2.49376	3.21354	2.29119
155	DTMA-155	1	1.47446	1.83333	1.66809	1.75471	1.53753
156	DTMA-156	1	1.00781	1	0.998237	1.36397	1.0712
157	DTMA-157	3.33333	2.43339	1.66667	2.50837	2.91115	2.56582
158	DTMA-158	3.66667	2.44596	1.66667	2.83449	2.80495	2.67203
159	DTMA-159	1.83333	1.57855	2	2.82324	1.88117	2.02762
160	DTMA-160	1.83333	2.41449	2.16667	2.34778	2.86821	2.35343
161	DTMA-161	1.33333	1.32335	1.33333	2.82858	1.32081	1.66186
162	DTMA-162	3.72585	2.60428	1.83333	2.82436	3.68123	2.90474
163	DTMA-163	2.33333	1.69244	2	3.24801	3.04353	2.4521
164	DTMA-164	3.33333	2.15026	2.16667	3.65269	3.51909	2.94243
165	DTMA-165	2.5	2.26583	1.33333	3.14609	2.46285	2.34597
166	DTMA-166	2	1.10321	1.33333	2.65207	1.84594	1.804
167	DTMA-167	1.33333	1.68063	2.16667	2.9849	2.08983	2.04173
168	DTMA-168	3.33333	3.52929	3	3.98877	4.68839	3.708
169	DTMA-169	1	1.65952	1	2.01208	1.94034	1.5037
170	DTMA-170	3.5	2.88097	2.33333	4.35251	3.15191	3.20559
171	DTMA-171	1.66667	1.62333	1.33333	2.82584	3.26071	2.15296
172	DTMA-172	1	1.83423	1	1.83474	1.39934	1.43121
173	DTMA-173	1.33333	1.27999	1.5	3.34229	2.86251	2.05995
174	DTMA-174	2	1.20026	1	2.00676	1.53034	1.57516
175	DTMA-175	2	1.44812	1.5	2.1689	1.83894	1.78356
176	DTMA-176	2.5	2.45159	2	2.98106	2.60356	2.50661
177	DTMA-177	2.26621	1.58421	2.83333	3.17873	1.83531	2.31529
178	DTMA-178	2.5	1.48843	2	3.00613	3.08971	2.4099
179	DTMA-179	1.66667	1.49506	1.33333	2.827	2.01225	1.86133
180	DTMA-180	1.66667	1.52102	2.16667	2.66217	1.91209	1.98923
181	DTMA-181	1.5	1.36467	1.33333	1.65669	1.92015	1.57311
182	DTMA-182	1.16667	1.55502	1.66667	2.35521	1.72099	1.71944
183	DTMA-183	NA	1.61148	1.66667	3.65144	2.64848	2.33774
184	DTMA-184	1.83333	1.06079	1.66667	2.6533	1.887	1.78923
185	DTMA-185	1.5	1.70548	2	3.35989	3.12132	2.31241
186	DTMA-186	1.33333	1.50632	1.47945	NA	NA	1.72426
187	DTMA-187	1	1.00028	2.5	2.51531	1.95897	1.81201
188	DTMA-188	1	1.21145	2	2.14239	1.72694	1.61824
189	DTMA-189	1.83333	1.24514	1	2.34577	1.61595	1.6187
190	DTMA-190	1	1.79809	1.33333	2.6609	2.37422	1.83356
191	DTMA-191	2.5	2.65915	2.33333	3.6633	2.78965	2.77786
192	DTMA-192	1.91667	3.17853	2.16667	2.17693	1.86368	2.23796
193	DTMA-193	1	1.19706	1.5	2.16068	1.86058	1.54839
194	DTMA-194	1.01621	1.0778	1.16667	NA	1.51016	1.31515
195	DTMA-195	1.33333	1.35377	1.66667	2.84615	1.50122	1.75781
196	DTMA-196	1	1.01993	2	2.33022	1.79532	1.65314
197	DTMA-197	1.33333	1.44635	1.66667	NA	1.60022	1.62158
198	DTMA-198	1	1.94676	1.33333	2.1721	2.51174	1.80426
199	DTMA-199	1	1.30636	2.5	NA	2.41838	1.93896
200	DTMA-200	1	1.15757	1	2.00292	1.97939	1.41093
201	DTMA-201	1.33333	1.53151	1.66667	3.32558	2.49641	2.0754
202	DTMA-202	1	1.06926	1.66667	3.01877	1.67904	1.7248
203	DTMA-203	2.66667	2.1553	1.5	2.36327	2.23766	2.22233
204	DTMA-204	2	1.72179	1.66667	2.00326	2.41938	1.96834
205	DTMA-205	2.48413	1.50375	1.5	2.66354	2.19065	2.01661
206	DTMA-206	1.33333	1.02573	1.66667	2.99178	2.07306	1.79017
207	DTMA-207	2.16667	2.14547	1.66667	2.82114	2.28741	2.20105
208	DTMA-208	3	2.47959	2.83333	4.01115	2.55047	2.9698
209	DTMA-209	1	2.33653	1.66667	2.15902	1.67156	1.75787
210	DTMA-210	2.16667	3.02739	1.66667	3.3258	3.56635	2.75445
211	DTMA-211	2	1.6466	1.66667	2.64397	2.67296	2.11752
212	DTMA-212	2.66667	2.68369	3.16667	4.00598	3.43305	3.15611
213	DTMA-213	3.33333	3.13065	2	3.48092	2.21316	2.81199
214	DTMA-214	1	0.969737	2	2.97767	1.97756	1.75148
215	DTMA-215	3.33333	3.081	3	3.85456	3.33034	3.34692
216	DTMA-216	1.33333	2.87052	2.16667	2.8381	2.46002	2.34506
217	DTMA-217	3.33333	2.57319	2.16667	3.00712	2.49026	2.74556
218	DTMA-218	3.33333	2.42234	2.16667	3.16932	2.59289	2.71544
219	DTMA-219	1	1.89364	1.33333	2.02279	1.93176	1.6559
220	DTMA-220	3.16667	1.33884	1.83333	2.82907	2.46093	2.32253
221	DTMA-221	1	0.978654	1.33333	1.1572	1.18224	1.10555
222	DTMA-222	3	2.95141	2	3.32708	2.56085	2.7397
223	DTMA-223	3.5	4.08016	2.33333	3.83027	4.92986	3.75199
224	DTMA-224	1	1.50443	1.66667	1.68278	2.08813	1.58953
225	DTMA-225	NA	1.34999	2.5	2.98823	3.15131	2.45097
226	DTMA-226	2.66667	2.62008	2	3.0078	2.77921	2.59457
227	DTMA-227	2.16667	2.84167	1.66667	3.13769	2.36442	2.42468
228	DTMA-228	1	1.38917	1.33333	2.00201	1.65552	1.4946
229	DTMA-229	1.0483	1.51552	2	2.32172	1.99893	1.83839
230	DTMA-230	2.83333	2.62284	1.66667	3.00349	2.67227	2.55916
231	DTMA-231	1.33333	1.02723	1	1.98031	1.52134	1.36245
232	DTMA-232	1.5	1.17749	1.66667	2.0191	1.50326	1.57779
233	DTMA-233	1	1.25983	1.66667	1.00024	1.33714	1.26671
234	DTMA-234	1	1.84158	1.33333	2.00317	3.06942	1.82807
235	DTMA-235	2.16667	2.18672	2.16667	3.01374	3.11719	2.51624
236	DTMA-236	1	1.14918	1.33333	2.68614	1.97809	1.6442
237	DTMA-237	1.33333	1.28221	1.33333	2.32735	2.33904	1.70991
238	DTMA-238	1.16667	1.08173	1	0.992043	2.76563	1.40013
239	DTMA-239	2	1.82462	1.66667	2.81088	1.97817	2.06436
240	DTMA-240	2.66667	2.47926	2	3.50516	2.0849	2.5585
241	DTMA-241	1.83333	1.51603	1	2.02594	1.83393	1.63578
242	DTMA-242	1.33333	1.3296	2	2.31455	2.58	1.92007
243	DTMA-243	2.66667	2.11868	2.16667	4.16389	2.10682	2.63988
244	DTMA-244	1.66667	1.58509	2	3.17187	2.56593	2.20455
245	DTMA-245	3.33333	3.09841	1.5	3.68307	2.82845	2.90351
246	DTMA-246	1.33333	2.26051	2	2.83653	2.75438	2.2437
247	DTMA-247	1.66667	2.09872	1.83333	3.01004	2.85249	2.27882
248	DTMA-248	1	1.29892	2.33333	3.01125	2.14686	1.95572
249	DTMA-249	1.66667	2.19643	1.66667	3.18364	2.12461	2.19927
250	DTMA-250	3.33333	3.02519	1.66667	2.52231	2.43702	2.59757
251	DTMA-251	3.83333	3.04859	2.33333	2.97572	3.1594	3.05347
252	DTMA-252	3.16667	2.97076	1.33333	2.83173	2.91015	2.63035
253	DTMA-253	1.16667	2.02027	1.66667	2.8453	2.66894	2.07821
254	DTMA-254	2.66667	2.33076	2	3.01268	3.37568	2.64378
255	DTMA-255	1	2.00192	1.66667	3.0019	2.41816	2.02551
256	DTMA-256	1.83333	2.4381	2.33333	3.66324	2.15355	2.48512
257	DTMA-257	2.66667	2.09331	2	3.00854	2.96759	2.53933
258	DTMA-258	2.33333	2.06269	2	3.00145	2.59722	2.39743
259	DTMA-259	1.33333	1.99571	1.83333	2.86714	3.56222	2.3196
260	DTMA-260	1.33333	1.20134	1.66667	2.82367	2.12365	1.82578
261	DTMA-261	1	1.17873	1.66667	3.01474	1.98022	1.75469
262	DTMA-262	1.66667	1.53413	1.33333	2.97461	2.26751	1.95117
263	DTMA-263	2.16667	1.8203	2.16667	2.97181	2.04905	2.22753
264	DTMA-264	2.33333	1.68942	1.66667	3.00921	2.51352	2.23922
265	DTMA-265	1.5	1.80574	1.33333	3.14025	1.98635	1.95118
266	DTMA-266	2	1.97945	2	3.33353	1.9861	2.28582
267	DTMA-267	1.5	1.87393	1.66667	2.15426	2.09832	1.86397
268	DTMA-268	1.01621	1.24631	1.16667	2.33687	2.08421	1.55224
269	DTMA-269	4	3.89669	2.66667	3.97188	4.5322	3.8183
270	DTMA-270	2.66667	3.51726	2.33333	4.00244	2.76887	3.05283
271	DTMA-271	3	3.03045	1.5	2.68287	4.01986	2.85389
272	DTMA-272	1.83333	2.51768	1.33333	3.01034	2.21817	2.19851
273	DTMA-273	2.83333	2.8504	2	1.6769	2.34708	2.31869
274	DTMA-274	1.33333	1.14869	2	2.99077	1.90387	1.8884
275	DTMA-275	2.5	2.15711	2	2.5235	2.56009	2.33501
276	DTMA-276	3	3.17635	1.33333	1.98703	2.05796	2.29181
277	DTMA-277	1.5	1.37614	1	1.83056	1.83422	1.49137
278	DTMA-278	1	1.35027	1.33333	0.978269	1.73287	1.26288
279	DTMA-279	2	1.57765	2	2.02722	1.46401	1.83178
280	DTMA-280	3.16667	2.37801	2	3.51251	3.31984	2.91294
281	DTMA-281	2	1.37029	2.33333	2.65761	2.35125	2.16695
282	DTMA-282	2.33333	2.48065	1.66667	2.02234	NA	2.183
283	DTMA-283	2.33333	3.14964	2	2.82566	3.59681	2.78514
284	DTMA-284	1.5	1.62242	1	2.17419	1.47585	1.54995
285	DTMA-285	2.33333	1.13245	1.66667	2.63515	2.13244	1.97001
286	DTMA-286	1.83333	1.83457	1.33333	2.00391	1.84695	1.78228
287	DTMA-287	3	3.14615	2	2.99363	3.67243	2.97456
288	DTMA-288	1	1.69635	2	1.84426	1.89611	1.69184
289	DTMA-289	1	1.97513	1.83333	2.3518	2.44126	1.9232
290	DTMA-290	1.33333	0.978589	1.66667	2.65399	2.53041	1.8041
291	DTMA-291	3.16667	2.38089	2.16667	3.81473	3.59679	3.05455
292	DTMA-292	2.33333	2.03732	1.66667	3.18108	2.47311	2.3341
293	DTMA-293	2	1.97651	1.83333	3.15698	2.23042	2.23489
294	DTMA-294	1.5	1.65168	2	2.66924	2.92525	2.13378
295	DTMA-295	1.83333	1.26532	2	2.83741	2.14853	2.02765
296	DTMA-296	1.33333	1.01071	2	2.67821	2.75969	1.96054
297	DTMA-297	1.33333	1.32938	2	2.99546	2.31932	1.98154
298	DTMA-298	1.25	1.14308	1.83333	2.16691	2.32271	1.74199
299	DTMA-299	1.16667	1.70361	2	2.67546	2.10854	1.96809
300	DTMA-300	1.16667	1.01175	1	2.00965	2.59848	1.5668
		BA09A	BA09B	BA10	Celaya	Kenya09	5EnvCombineWithoutBA10
	Variation Range	1.0-4.5	1.0-4.5	1-4	1-5	1-5	1-5
	Panel Mean	1.8	1.9	1.7	2.5	2.3	2.1
	Trail Repeatibility	0.871192	0.791537	0.782276	0.95079	0.885142	0.909679
	LSDbα=0.05	0.86553	0.935161	0.686443	0.513702	0.71244	0.539045
	CV (%)	49.2	39.8	31.5	33.3	33.7	31.9
	Rust score is based on a 1 to 5 scale, where 1 = 0 to 10% of leaf surface diseased (no rust pustules or a few pustules scattered on the leaf surface)and 5 = over 75% of leaf surface diseased (many huge dry pustules surrounded by dead rusty wilted and blighted areas on the leaves) .Combined score is an average response of the entry in five environments.
	Environments in which maize inbred lines were evaluated. BA= El Batan, Mexico; Kenya09 = Embu, Kenya. The number that follows the abbreviation is the year / season when evaluations were conducted.
